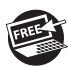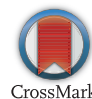

## Issues and Events

### Contact for information on ADA events:

American Diabetes Association  
1701 N. Beauregard St., Alexandria, VA 22311  
Tel: 800-232-3472, select option 1  
Fax: 703-549-1715 or 703-253-4358  
E-mail: [professionaleducation@diabetes.org](mailto:professionaleducation@diabetes.org)  
Web site: [professional.diabetes.org/ce](http://professional.diabetes.org/ce)

### ADA EVENTS

#### 29th Annual Clinical Conference

22–25 May 2014  
Marriott Marco Island  
Marco Island, Florida  
Web site: [professional.diabetes.org/cc](http://professional.diabetes.org/cc)

#### 74th Scientific Sessions

13–17 June 2014  
Moscone Center  
San Francisco, California  
Web site: [scientificsessions.diabetes.org](http://scientificsessions.diabetes.org)

#### Diabetes is Primary

14 June 2014  
San Francisco, California  
Web site: [professional.diabetes.org/primary](http://professional.diabetes.org/primary)

#### Diabetes and the Microbiome Research Symposium

Fall 2014  
Washington, DC Metropolitan Area  
Web site: [professional.diabetes.org/rs14](http://professional.diabetes.org/rs14)

#### 75th Scientific Sessions

5–9 June 2015  
Boston Convention and Exhibition Center  
Boston, Massachusetts  
Web site: [scientificsessions.diabetes.org](http://scientificsessions.diabetes.org)

### OTHER EVENTS

#### 15th Malvern Diabetic Foot Conference

14–16 May 2014  
Malvern, U.K.  
Web site: [www.malverndiabeticfoot.org](http://www.malverndiabeticfoot.org)

#### 82nd Congress of the European Atherosclerosis Society (EAS 2014)

31 May–3 June 2014  
Madrid, Spain  
Web site: [eas.kenes.com](http://eas.kenes.com)

**Diabetes Care** (print ISSN 0149-5992, online ISSN 1935-5548) is owned, controlled, and published monthly by the American Diabetes Association, Inc., 1701 North Beauregard St., Alexandria, VA 22311. *Diabetes Care* is a registered trademark of the American Diabetes Association. **Periodicals postage** paid at Alexandria, VA, and additional mailing offices. **POSTMASTER:** Send address changes to *Diabetes Care*, American Diabetes Association, Inc., Journal Subscriptions, 1701 North Beauregard St., Alexandria, VA 22311. Claims for missing issues should be made within 6 months of publication. The publisher expects to supply missing issues free of charge only when losses have been sustained in transit and when the reserve stock permits.
